# Supplementary material for: Reconstruction of fish allergenicity from the content and structural traits of the component β-parvalbumin isoforms
Source: PubMed Central journal article supplement (PMC6841720; doi:10.1038/s41598-019-52801-6), 2019-11-08

## **Reconstruction of fish allergenicity from the content and structural traits of the component $\beta$ -parvalbumin isoforms**

**Raquel Pérez-Tavarez<sup>1</sup>, Mónica Carrera<sup>2</sup>, María Pedrosa<sup>3,4</sup>, Santiago Quirce<sup>3,4</sup>, Rosa Rodríguez-Perez<sup>4</sup> and María Gasset<sup>1\*</sup>**

<sup>1</sup>Instituto Química-Física "Rocasolano", Consejo Superior de Investigaciones Científicas, 28006 Madrid, Spain.

<sup>2</sup>Instituto Investigaciones Marinas, Consejo Superior de Investigaciones Científicas, 36208 Vigo, Spain

<sup>3</sup>Dpto de Alergología, Hospital Universitario La Paz, 28046 Madrid, Spain

<sup>4</sup>Instituto de Investigación Hospital Universitario La Paz (IdiPaz), 28046 Madrid, Spain

**Supplementary Material**

**Table 1.** Clinical data of the patients allergic to fish and their sera features.

| Patient | Age (years) | sex | Symptoms after fish ingestion <sup>a</sup> | Ofended fish <sup>b</sup> | Other allergies                 | SPT <sup>c</sup> (mm)<br>Cod / Tuna | Total IgE (kU/l) | slgE (kU/l)<br>Cod / Tuna |
|---------|-------------|-----|--------------------------------------------|---------------------------|---------------------------------|-------------------------------------|------------------|---------------------------|
| S1      | 9.1         | M   | U, OAS                                     | Hake, tuna                | Seafood <sup>d</sup> , treenuts | 12 / 8                              | 1,020            | 13.9 / 7.24               |
| S2      | 10.2        | F   | U, AE, OAS, V                              | Hake, megrim              | Fruits                          | 5 / 4.5                             | 851              | 8.42 / 1.68               |
| S3      | 10.2        | M   | V                                          | Hake, cod, megrim         | Egg, seafood, legumes, treenuts | 6 / 0                               | 2,223            | 8.03 / 2.04               |
| S4      | 4.6         | M   | AE, U                                      | Hake                      | Egg                             | 15 / 12.5                           | 901              | 15.3 / 1.83               |
| S5      | 7.8         | M   | OAS, U                                     | Hake, megrim              | Egg, seafood, legumes, treenuts | 25.5 / 9.0                          | 278              | 92.7 / 31.2               |
| S6      | 10          | F   | AX                                         | Hake                      | Seafood                         | 7.5 / 6.5                           | 38.8             | 5.01 / 1.34               |
| S7      | 7.2         | M   | OAS                                        | Hake, megrim              | Egg, nuts, legumes              | 13 / 5.5                            | 1,382            | 25.7 / 8.72               |

<sup>a</sup> Abbreviations correspond to: AE: angioedema; OAS: oral allergy syndrome; U: urticaria.

<sup>b</sup> Fish species causing initial symptomatology upon oral exposure.

<sup>c</sup> Mean diameter

<sup>d</sup> Molluscs and crustaceans.

**Figure 1S** : Original gels of Fig. 2a and 2b.

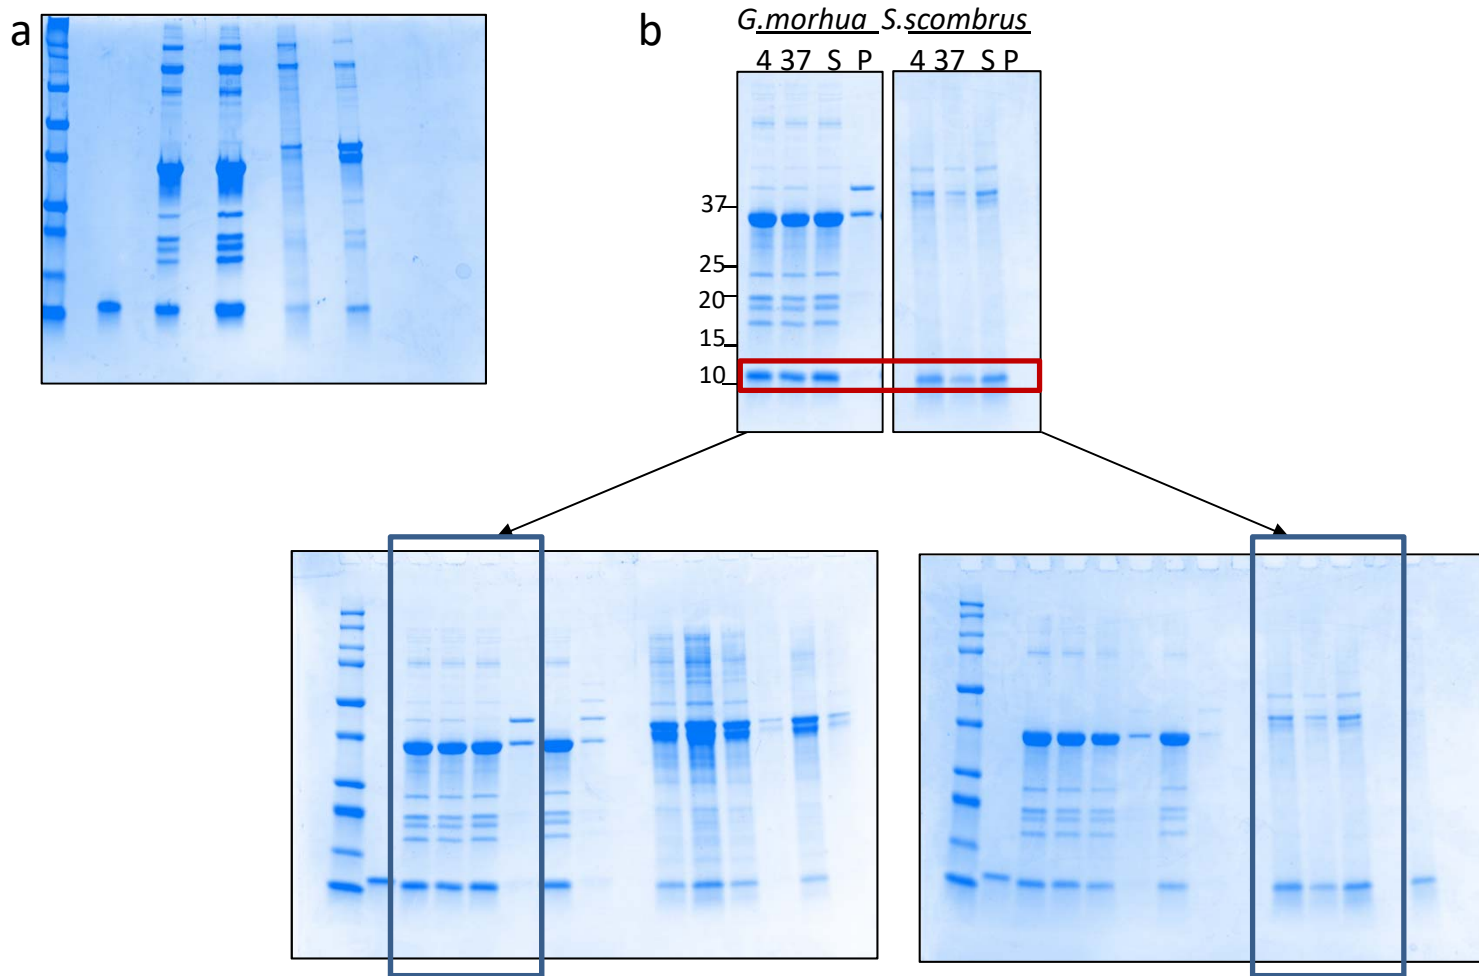

**Figure 2S** : Original gels and membranes of Fig. 3a and 3b.

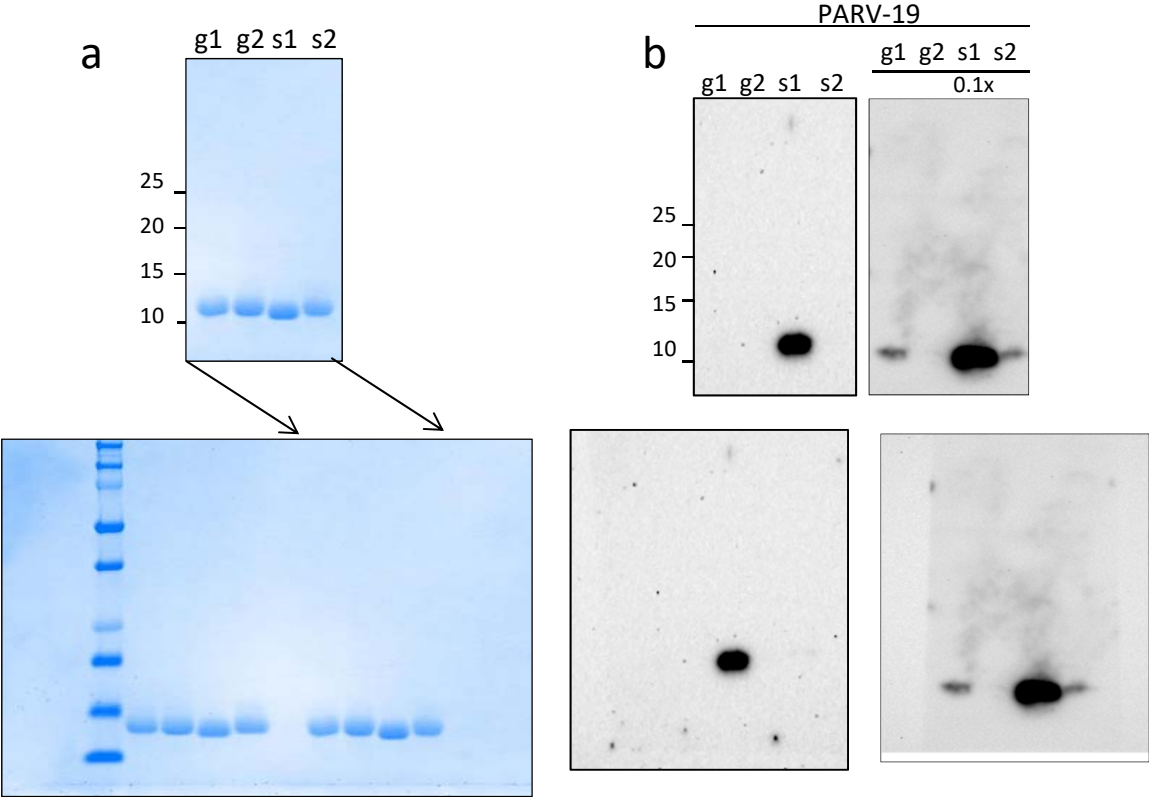

**Figure 3S** : Original blots used in Fig. 3c.

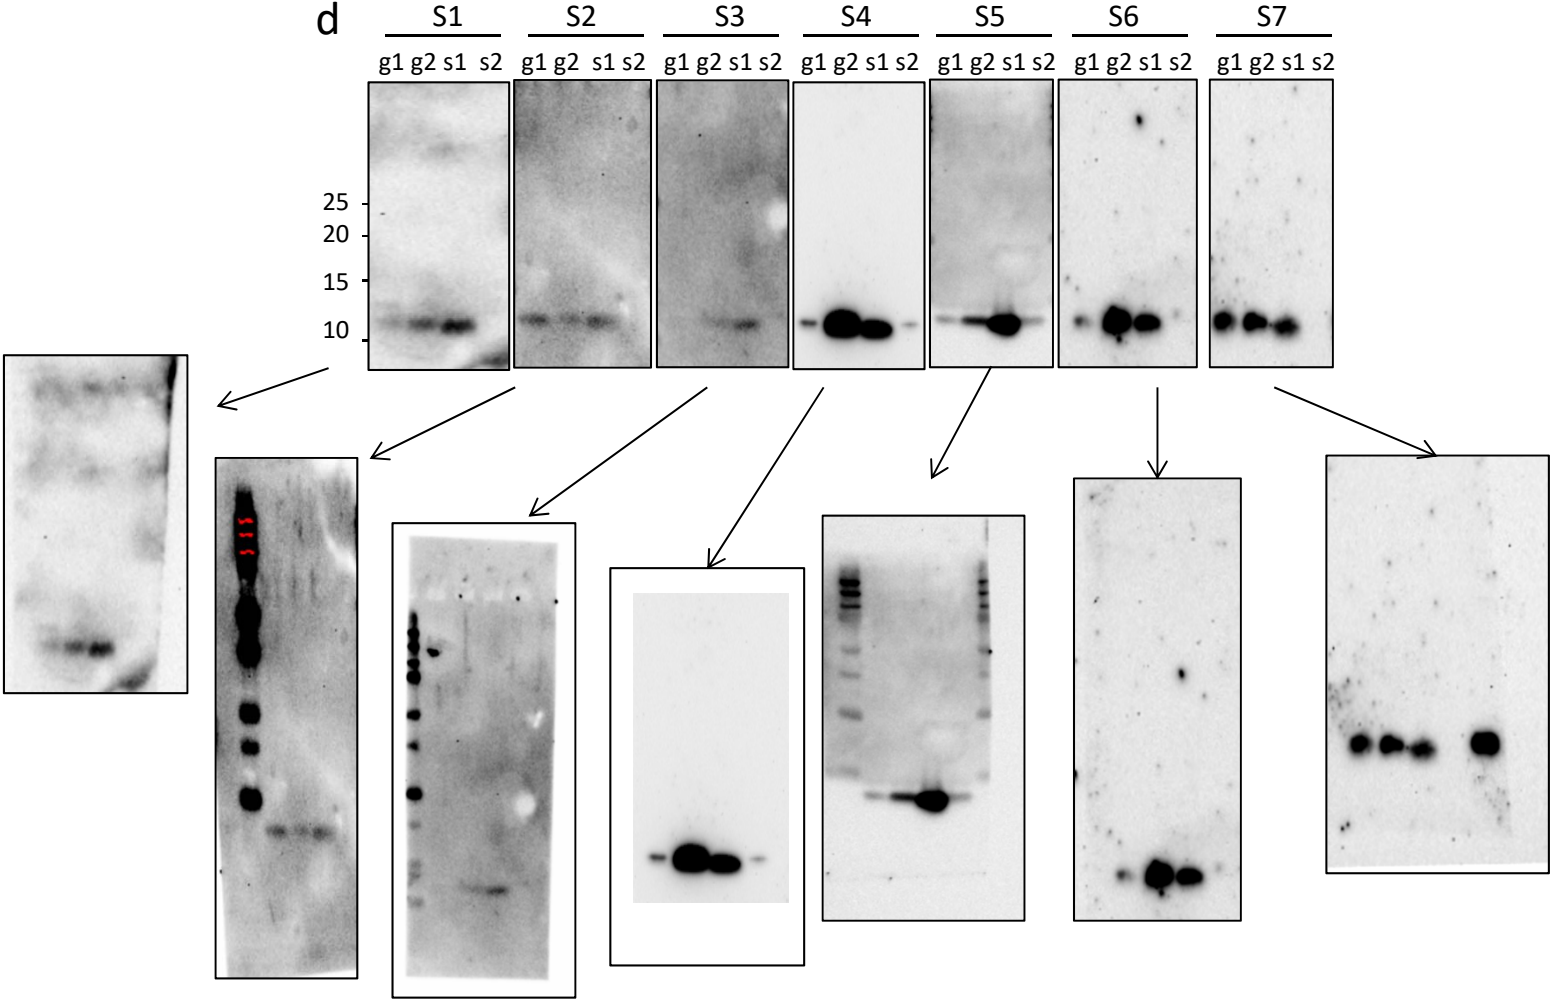

**Figure 4S** : Full length gel of Fig. 4d.

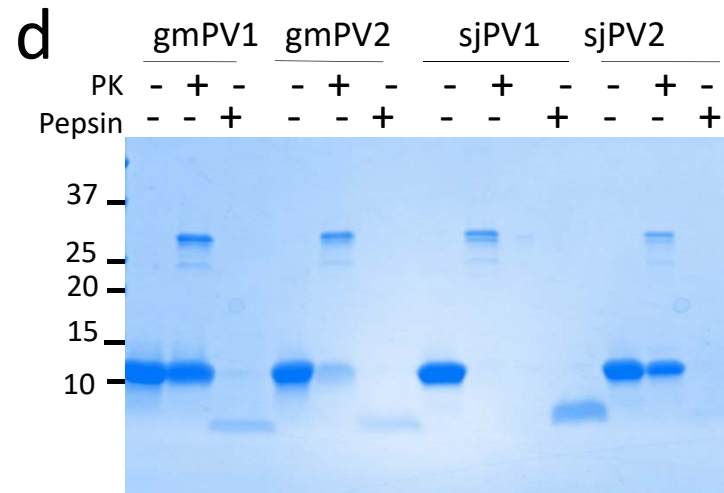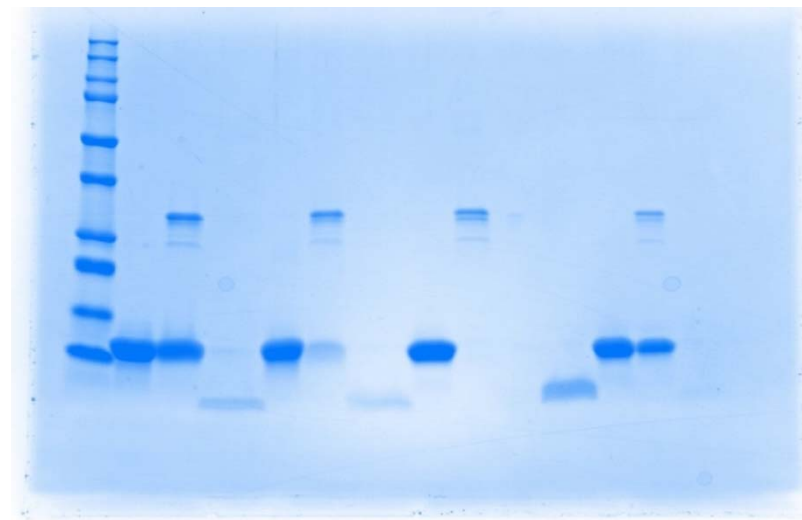

**Figure 5S** : Full-length gel of Fig. 5b.

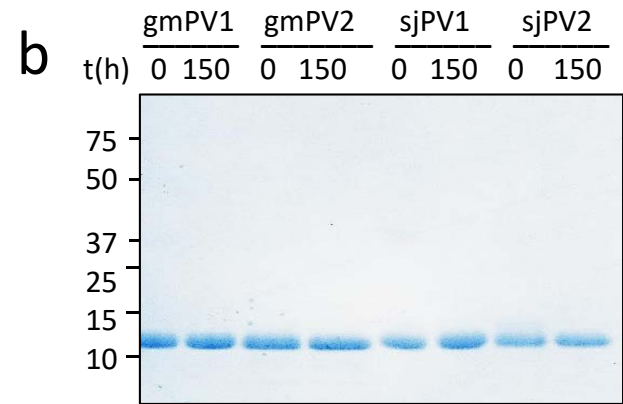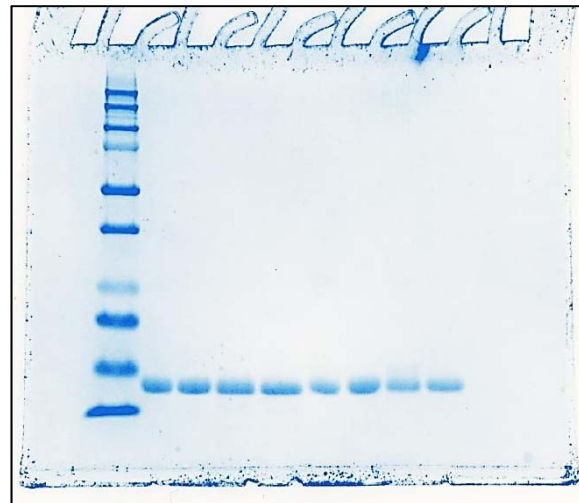

**Figure 6S** : Original membranes of Fig. 6b and 6c

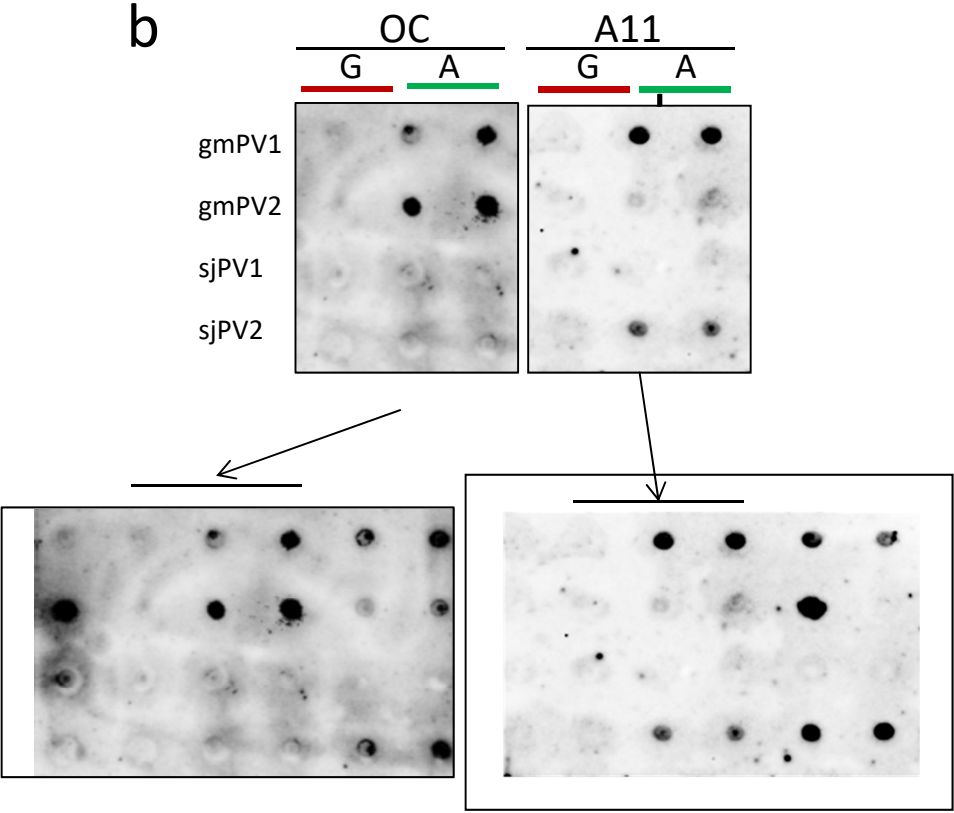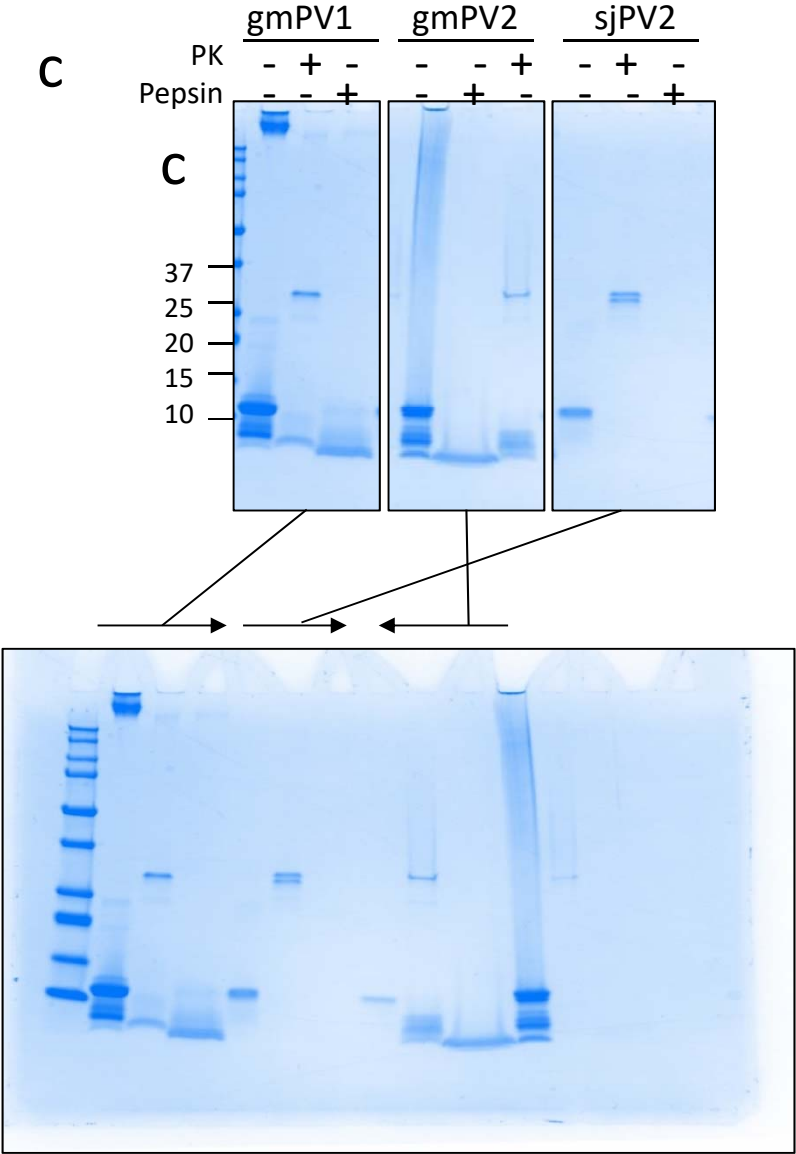



**Figure 7S** : Full size membranes of Fig. 7a, 7b and 7e.

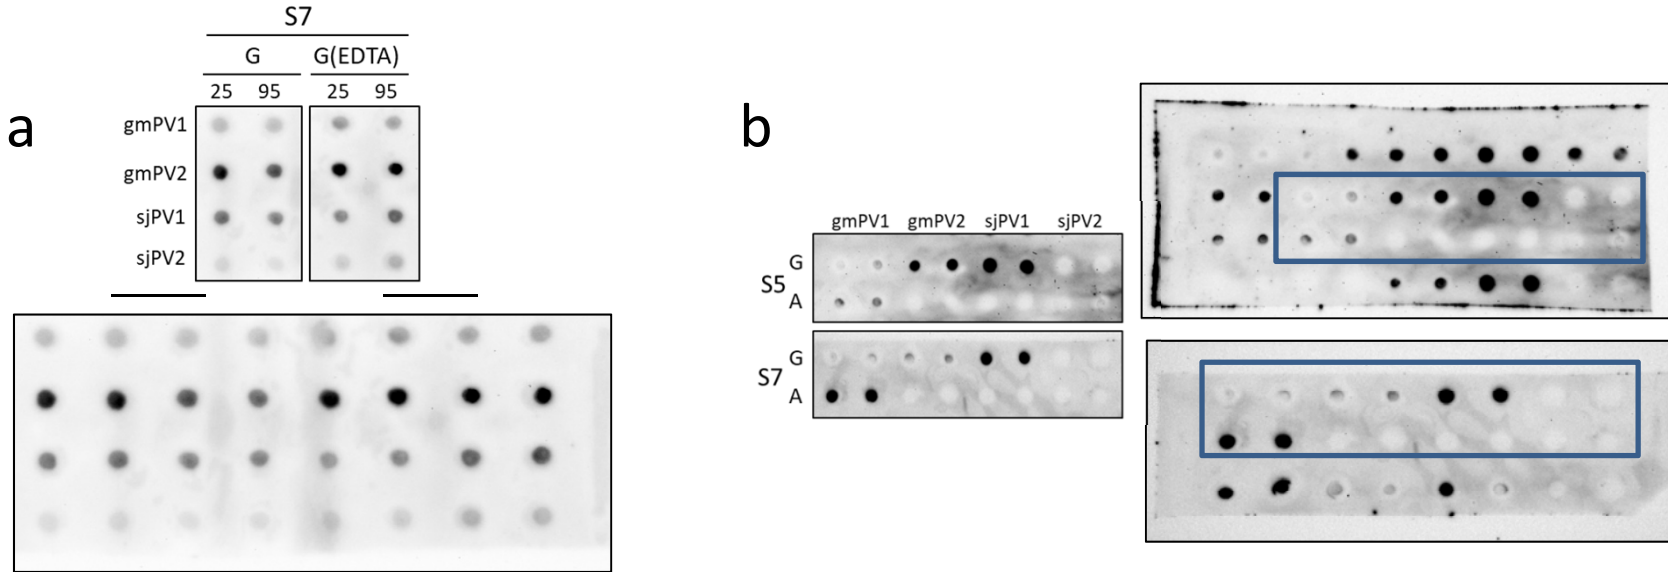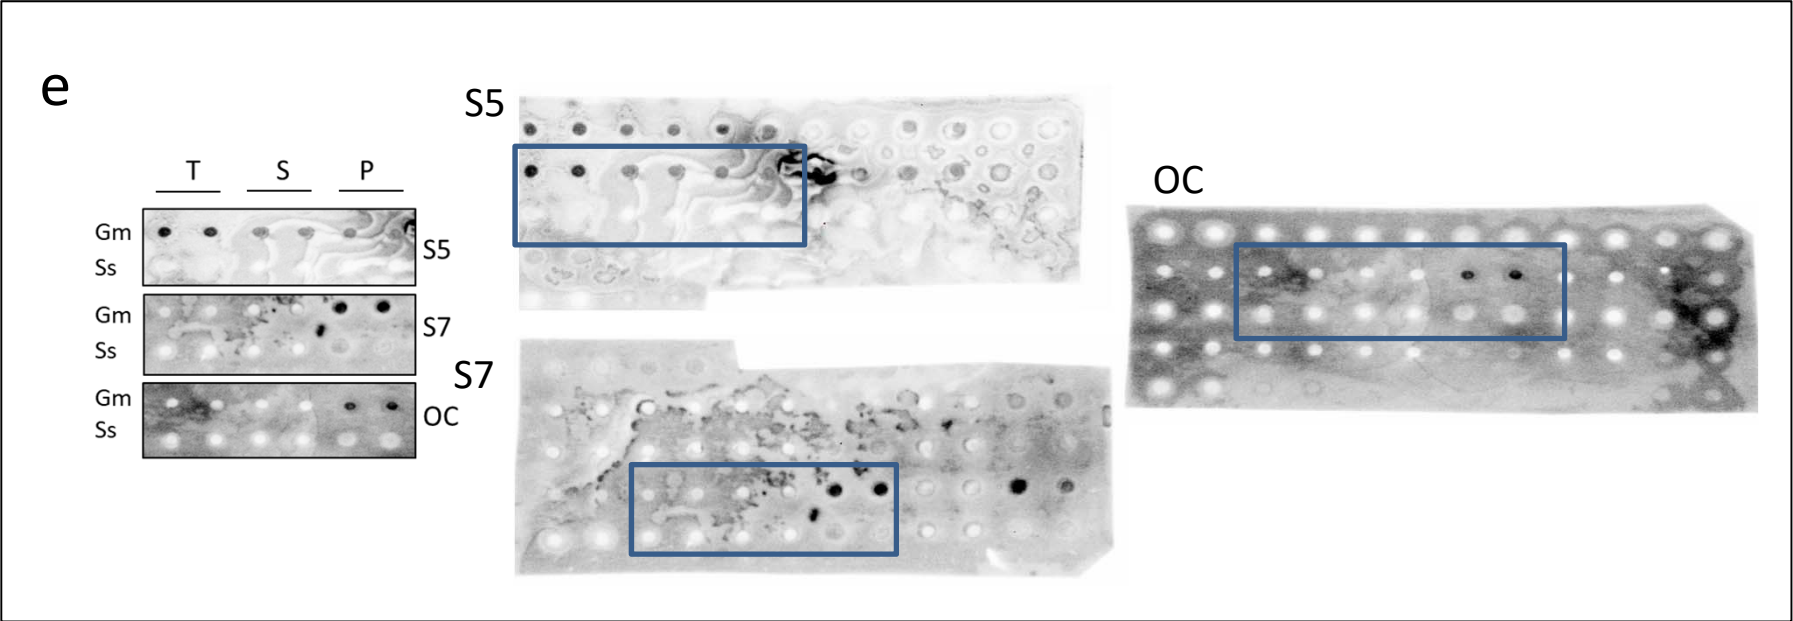

Supplement: 41598_2019_52801_MOESM1_ESM.pdf [file 41598_2019_52801_MOESM1_ESM.pdf]
